# Supplementary material
Source: PubMed Central journal article supplement (PMC10524616)
Supplement: NIHMS1902590-supplement-1.pdf [file NIHMS1902590-supplement-1.pdf]

## Group I. Histone acetyltransferases

### Group Ia. HATs

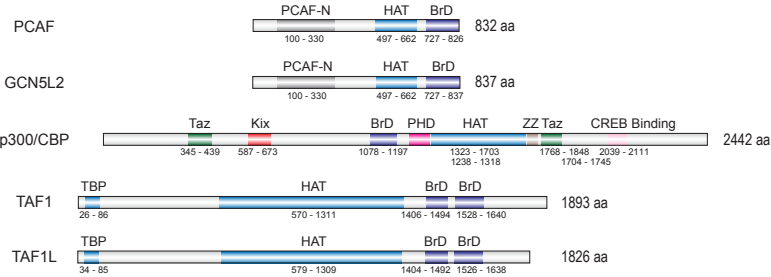

### Group Ib. MOZ HATs

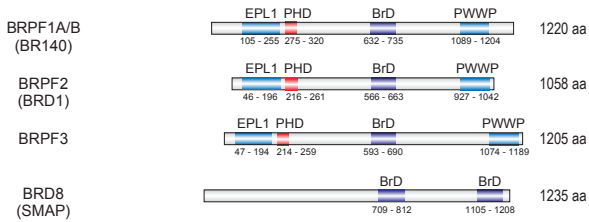

## Group II. Histone methyltransferases

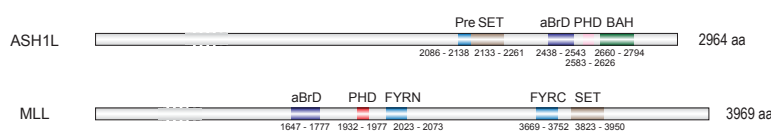

## Group III. Chromatin remodeling factors

### Group IIIa. SWI/SNF complexes

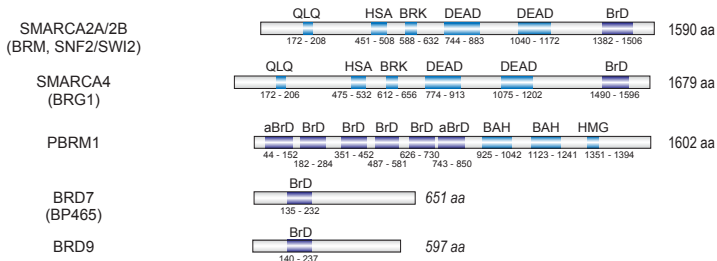

### Group IIIb. ISWI complexes

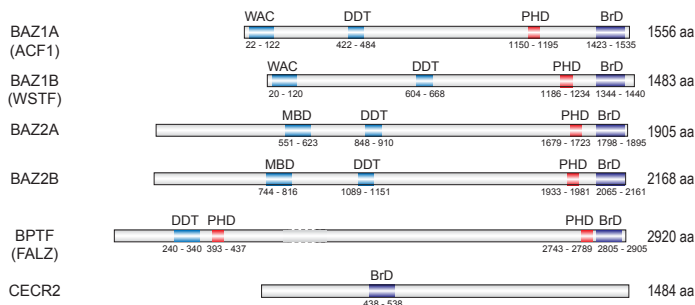

## Group IV. AAA ATPase proteins

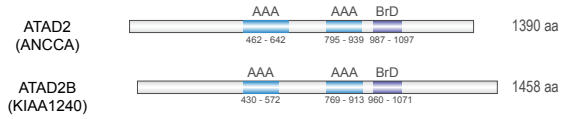

## Group V. BET family transcriptional coactivators

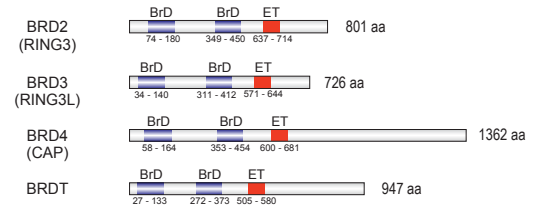

## Group VI. E3 SUMO/ubiquitin ligases

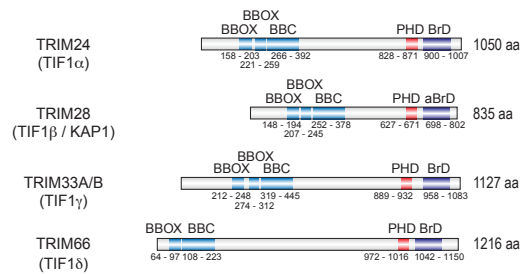

## Group VII. SP family proteins of PML nuclear bodies

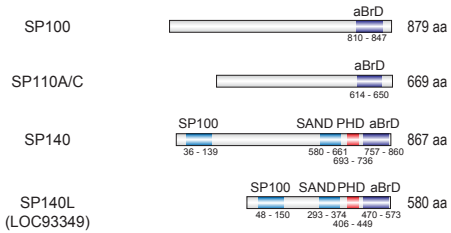

## Group VIII. Transcriptional corepressors

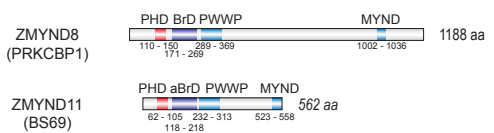

## Group IX. WD-repeat proteins

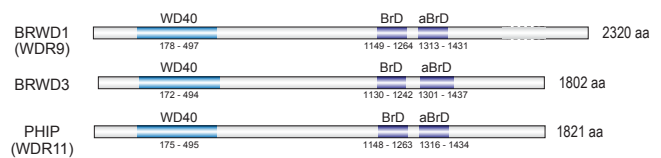

**Supplementary Figure 1. Human bromodomain proteins grouped based on their functions in regulation of gene transcription in chromatin.** Key functional domains in each protein are shown as indicated with the BrD highlighted in purple. Note that 'aBrD' is regarded as atypical BrD that does not contain a conserved Asn residue required for acetyl-lysine recognition through a hydrogen bonding interaction.

**Supplementary Table 1. Bromodomain inhibitors in human clinical trials**

| Compounds                                           | Organization                                                                       | Indication                                                                                                                                                                                                                                                          | Phase/Status/start date            | NCT Identifier*         |
|-----------------------------------------------------|------------------------------------------------------------------------------------|---------------------------------------------------------------------------------------------------------------------------------------------------------------------------------------------------------------------------------------------------------------------|------------------------------------|-------------------------|
| <b>GSK525762</b><br>(Molibresib)                    | GlaxoSmithKline                                                                    | Solid Tumors                                                                                                                                                                                                                                                        | 2/Withdrawn/Dec. 2017              | NCT03266159             |
|                                                     |                                                                                    | NUT Midline Carcinoma (NMC)                                                                                                                                                                                                                                         | 1/Completed/Mar. 2020              | NCT01587703             |
|                                                     |                                                                                    | Neoplasms (+Fulvestrant)                                                                                                                                                                                                                                            | 1/Completed/Jan. 2022              | NCT02964507             |
| <b>GSK2820151*</b><br><b>OTX015</b><br>(Birabresib) | GlaxoSmithKline                                                                    | Cancer/ Neoplasms                                                                                                                                                                                                                                                   | 2/Terminated/ Feb. 2020            | NCT02630251             |
|                                                     | Oncoethix GmbH                                                                     | AML (+Azacytidine)                                                                                                                                                                                                                                                  | 1, 2/Withdrawn/Sep. 2016           | NCT02303782             |
| <b>RO6870810</b><br>(TEN-0101)                      | Merck Sharp & Dohme LLC<br>Hoffmann-La Roche                                       | Acute Myeloid Leukemia (AML), Diffuse Large B-cell Lymphoma (DLBCL), Acute Lymphoblastic Leukemia (ALL), Multiple Myeloma (MM)                                                                                                                                      | 1/Completed/Jan. 2021              | NCT01713582             |
|                                                     |                                                                                    | NMC, Triple Negative Breast Cancer (TNBC), Non-small Cell Lung Cancer (NSCLC) with Rearranged ALK Fusion Protein or KRAS Mutation, Castrate-resistant Prostate Cancer (CRPC), Pancreatic Ductal Adenocarcinoma                                                      | 1/Completed/Jan. 2021              | NCT02259114             |
|                                                     |                                                                                    | Glioblastoma Multiforme                                                                                                                                                                                                                                             | 2/Terminated/ Jan. 2021            | NCT02296476             |
|                                                     |                                                                                    | NMC, TNBC, NSCLC, CRPC                                                                                                                                                                                                                                              | 1/Terminated/Jan. 2021             | NCT02698176             |
|                                                     |                                                                                    | AML (AML <i>de Novo</i> and AML Secondary to MDS), DLBCL                                                                                                                                                                                                            | 1/Terminated/Oct. 2021             | NCT02698189             |
|                                                     |                                                                                    | AML, Myelodysplastic Syndromes (MDS)                                                                                                                                                                                                                                | 1/Completed/Dec. 2017              | NCT02308761             |
| <b>CPI-0610</b><br>(Pelabresib)                     | Constellation/<br>MorphoSys                                                        | Advanced Solid Tumors                                                                                                                                                                                                                                               | 1/Completed/Jan. 2018              | NCT01987362             |
|                                                     |                                                                                    | MM                                                                                                                                                                                                                                                                  | 1/Completed/Feb. 2020              | NCT03068351             |
|                                                     |                                                                                    | Advanced Ovarian Cancer, TNBC (+Atezolizumab)                                                                                                                                                                                                                       | 1/Terminated/Nov. 2020             | NCT03292172             |
|                                                     |                                                                                    | DLBCL, High-Grade B-cell Lymphoma                                                                                                                                                                                                                                   | 1/Completed/Jan. 2022              | NCT03255096             |
|                                                     |                                                                                    | Peripheral Nerve Tumors                                                                                                                                                                                                                                             | 2/Withdrawn/Sep. 2018              | NCT02986919             |
|                                                     |                                                                                    | Lymphoma                                                                                                                                                                                                                                                            | 1/Completed/May 2022               | NCT01949883             |
|                                                     |                                                                                    | MM                                                                                                                                                                                                                                                                  | 1/Completed/May 2022               | NCT02157636             |
|                                                     |                                                                                    | Myelofibrosis (MF), AML, Myelodysplastic/Myeloproliferative Neoplasm, MDS, Preleukemia, Primary MF, Bone Marrow Disease, Hematological Disease, Precancerous Conditions, Neoplasms, Leukemia, Neoplasms by Histologic Type, Essential Thrombocytosis (+Ruxolitinib) | 1,2/Recruiting/May 2022            | NCT02158858             |
|                                                     |                                                                                    | Advanced Malignancies, Solid Tumor, Hematological Malignancy                                                                                                                                                                                                        | 1/ Recruiting/May. 2022            | NCT05391022             |
|                                                     |                                                                                    | Myelofibrosis, Primary MF, Post-polycythemia Vera MF, Post-essential Thrombocytopenia MF (+Ruxolitinib)                                                                                                                                                             | 3/Recruiting/June 2022             | NCT04603495             |
| <b>ABBV-075</b><br>(Miverbresib)                    | AbbVie                                                                             | Cancer, Breast Cancer, NSCLC, AML, MM, PC, Small Cell Lung Cancer (SCLC), Non-Hodgkins Lymphoma (NHL) (+Venetoclax)                                                                                                                                                 | 1/Completed/Nov. 2019              | NCT02391480             |
|                                                     |                                                                                    | <b>ABBV-744</b>                                                                                                                                                                                                                                                     | MF (+Navitoclax, +Ruxolitinib)     | 1/ Recruiting/July 2020 |
| <b>INCB057643</b>                                   | Incyte                                                                             | AML                                                                                                                                                                                                                                                                 | 1/Terminated/Mar. 2021             | NCT03360006             |
|                                                     |                                                                                    | MF, MDS, Myelodysplastic/Myeloproliferative Neoplasm Overlap Syndrome, Myeloproliferative Neoplasm, Relapsed or Refractory Primary MF, Secondary MF (Post-Polycythemia Vera MF, Post-Essential Thrombocytopenia MF) (+Ruxolitinib)                                  | 1/Recruiting/ Feb. 2020            | NCT04279847             |
| <b>CC-90010</b>                                     | Celgene                                                                            | Solid Tumors (+Gemcitabine, +Paclitaxel, +Rucaparib, +Abiraterone, +Ruxolitinib, +Azacitidine)                                                                                                                                                                      | 1, 2/Terminated/Apr. 2022          | NCT02711137             |
|                                                     |                                                                                    | NHL, Neoplasms                                                                                                                                                                                                                                                      | 1/Active, not recruiting/July 2017 | NCT03220347             |
|                                                     |                                                                                    | Glioblastoma + Temozolomide                                                                                                                                                                                                                                         | 1/ Recruiting/Mar. 2020            | NCT04324840             |
| <b>BMS-986158</b>                                   | Bristol-Myers Squibb<br>Dana-Farber Cancer                                         | Astrocytoma, Glioblastoma                                                                                                                                                                                                                                           | 1/Active, not recruiting/Jan. 2022 | NCT04047303             |
|                                                     |                                                                                    | Advanced Tumors (+Nivolumab)                                                                                                                                                                                                                                        | 1,2/Completed/Feb. 2022            | NCT02419417             |
| <b>PLX51107</b>                                     | Plexxikon/<br>Daiichi Sankyo                                                       | Solid Tumor, Childhood, Lymphoma, Brain Tumor, Pediatric                                                                                                                                                                                                            | 1/Recruiting/Jan. 2022             | NCT03936465             |
| <b>CCS1477</b>                                      | CellCentric Ltd                                                                    | AML, MDS, Myelodysplastic/Myeloproliferative Neoplasm, Myeloproliferative Neoplasm                                                                                                                                                                                  | 1/Recruiting/Mar. 2020             | NCT04022785             |
|                                                     |                                                                                    | mCRPC, Advanced Solid Tumors                                                                                                                                                                                                                                        | 1, 2/Recruiting/ June 2018         | NCT03568656             |
| <b>INCB05432</b><br><b>RVX-208</b><br>(Apabetalone) | Incyte<br>Resverlogix Corp                                                         | Hematological Malignancy, AML, NHL, MM                                                                                                                                                                                                                              | 1, 2/Recruiting/Aug. 20            | NCT04068597             |
|                                                     |                                                                                    | Solid Tumors and Hematologic Malignancy                                                                                                                                                                                                                             | 1, 2/Terminated/June 2019          | NCT02431260             |
| <b>ZEN-3694**</b>                                   | Laval University<br>Steeve Provencher<br>Zenith Epigenetics<br>Haider Mahdi<br>NCI | Coronary Artery Disease                                                                                                                                                                                                                                             | 2/Completed/June 2013              | NCT01067820             |
|                                                     |                                                                                    | Diabetes                                                                                                                                                                                                                                                            | 2/Completed/APR. 2014              | NCT01728467             |
|                                                     |                                                                                    | Dyslipidemia, Coronary Artery Disease                                                                                                                                                                                                                               | 2/Terminated/ May 2015             | NCT01863225             |
|                                                     |                                                                                    | Dyslipidemia, Atherosclerosis, Acute Coronary Syndrome, Cardiovascular Disease                                                                                                                                                                                      | 1, 2/Completed/July 2016           | NCT00768274             |
|                                                     |                                                                                    | Atherosclerosis, Coronary Artery Disease                                                                                                                                                                                                                            | 2/Completed/July 2016              | NCT01058018             |
|                                                     |                                                                                    | Kidney Failure, Chronic                                                                                                                                                                                                                                             | 1, 2/Not yet recruited/July 2019   | NCT03160430             |
|                                                     |                                                                                    | Diabetes Mellitus, Type 2, coronary artery disease (+Atorvastatin, +Rosuvastatin)                                                                                                                                                                                   | 3/Completed/Aug. 2021              | NCT02586155             |
|                                                     |                                                                                    | Pulmonary Arterial Hypertension                                                                                                                                                                                                                                     | 2/ Not yet recruiting/Apr. 2022    | NCT04915300             |
|                                                     |                                                                                    | Pulmonary Arterial Hypertension                                                                                                                                                                                                                                     | Early 1/Completed/Apr. 2022        | NCT03655704             |
|                                                     |                                                                                    | Metastatic CRPC (+Enzalutamide)                                                                                                                                                                                                                                     | 2/Recruiting/Feb. 2022             | NCT04986423             |
| <b>BAY1238097</b><br><b>SF1126</b>                  | Bayer<br>SignalRX                                                                  | TNBC (+Talazoparib)                                                                                                                                                                                                                                                 | 2/Active, Not recruiting/Feb 2022  | NCT03901469             |
|                                                     |                                                                                    | mCRPC, PC, Metastatic Prostate Small Cell Carcinoma, Stage IV PC AJCC v8, Stage IVA PC AJCC v8, Stage IVB PC AJCC v8 (+Enzalutamide)                                                                                                                                | 2/Recruiting/Mar. 2022             | NCT04471974             |
|                                                     |                                                                                    | Ovarian Cancer, Peritoneal Cancer, Fallopian Tube Cancer (+Talazoparib)                                                                                                                                                                                             | 2/Recruiting/ May 2022             | NCT05071937             |
| <b>BAY1238097</b>                                   | Bayer                                                                              | Metastatic NMC, Unresectable NMC (+Cisplatin, +Etoposide)                                                                                                                                                                                                           | 1,2/Recruiting/May 2022            | NCT05019716             |
|                                                     |                                                                                    | Metastatic Solid Neoplasm, Metastatic or Unresectable NMC (+Abemaciclib)                                                                                                                                                                                            | 1/Not yet recruiting/May 2022      | NCT05372640             |
| <b>SF1126</b>                                       | SignalRX                                                                           | Neoplasms                                                                                                                                                                                                                                                           | 1/Terminated/Mar 2016              | NCT02369029             |
|                                                     |                                                                                    | Advanced Hepatocellular Carcinoma (+Nivolumab)                                                                                                                                                                                                                      | 1/Terminated/May 2022              | NCT03059147             |

\* More details at <https://clinicaltrials.gov>; \*\* Structure not reported.
